# Supplementary material for: Changes in cardiovascular disease monitoring in English primary care during the COVID-19 pandemic: an observational cohort study
Source: bioRxiv or medRxiv preprint supplement (doi:10.1101/2020.12.11.20247742), 2020-12-14
Supplement: Supplementary file [file media-1.pdf]

| ConditionID | ConditionName         | ConceptID        | Term                                                             |
|-------------|-----------------------|------------------|------------------------------------------------------------------|
| 2051        | Blood Pressure - Both | 502541000000105  | [D]Blood pressure raised, hypertension not diagnosed (situation) |
| 2051        | Blood Pressure - Both | 502551000000108  | [D]Nonspecific low blood pressure reading (situation)            |
| 2051        | Blood Pressure - Both | 207519004        | [D]Raised blood pressure reading (situation)                     |
| 2051        | Blood Pressure - Both | 314463006        | 24 hour blood pressure (observable entity)                       |
| 2051        | Blood Pressure - Both | 386534000        | Arterial blood pressure (observable entity)                      |
| 2051        | Blood Pressure - Both | 723232008        | Average blood pressure (observable entity)                       |
| 2051        | Blood Pressure - Both | 928031000000105  | Baseline blood pressure                                          |
| 2051        | Blood Pressure - Both | 928021000000108  | Baseline blood pressure (observable entity)                      |
| 2051        | Blood Pressure - Both | 250765005        | Blood pressure (observable entity)                               |
| 2051        | Blood Pressure - Both | 75367002         | Blood pressure (observable entity)                               |
| 2051        | Blood Pressure - Both | 392570002        | Blood pressure finding (finding)                                 |
| 2051        | Blood Pressure - Both | 314956000        | Borderline blood pressure (finding)                              |
| 2051        | Blood Pressure - Both | 170604000        | Borderline blood pressure (finding)                              |
| 2051        | Blood Pressure - Both | 147850007        | Borderline blood pressure (finding)                              |
| 2051        | Blood Pressure - Both | 1036541000000104 | Central blood pressure                                           |
| 2051        | Blood Pressure - Both | 12763006         | Finding of decreased blood pressure (finding)                    |
| 2051        | Blood Pressure - Both | 24184005         | Finding of increased blood pressure (finding)                    |
| 2051        | Blood Pressure - Both | 62275004         | Hypertensive episode (disorder)                                  |
| 2051        | Blood Pressure - Both | 251077004        | Invasive arterial pressure (observable entity)                   |
| 2051        | Blood Pressure - Both | 386532001        | Invasive arterial pressure (observable entity)                   |
| 2051        | Blood Pressure - Both | 386533006        | Invasive blood pressure (observable entity)                      |
| 2051        | Blood Pressure - Both | 163033001        | Lying blood pressure (observable entity)                         |
| 2051        | Blood Pressure - Both | 140246009        | Lying blood pressure reading (observable entity)                 |
| 2051        | Blood Pressure - Both | 852291000000105  | Maximum mean blood pressure (observable entity)                  |
| 2051        | Blood Pressure - Both | 6797001          | Mean blood pressure (observable entity)                          |
| 2051        | Blood Pressure - Both | 251076008        | Non-invasive arterial pressure (observable entity)               |
| 2051        | Blood Pressure - Both | 723237002        | Non-invasive blood pressure (observable entity)                  |
| 2051        | Blood Pressure - Both | 1036531000000108 | Non-invasive central blood pressure (observable entity)          |
| 2051        | Blood Pressure - Both | 170605004        | Normal blood pressure (finding)                                  |
| 2051        | Blood Pressure - Both | 2004005          | Normal blood pressure (finding)                                  |
| 2051        | Blood Pressure - Both | 147851006        | Normal blood pressure (finding)                                  |
| 2051        | Blood Pressure - Both | 140249002        | O/E - blood pressure decreased (finding)                         |
| 2051        | Blood Pressure - Both | 140233004        | O/E - blood pressure reading (finding)                           |
| 2051        | Blood Pressure - Both | 140237003        | O/E - BP borderline low (finding)                                |
| 2051        | Blood Pressure - Both | 140239000        | O/E - BP borderline raised (finding)                             |
| 2051        | Blood Pressure - Both | 140236007        | O/E - BP reading low (finding)                                   |
| 2051        | Blood Pressure - Both | 140238008        | O/E - BP reading normal (finding)                                |
| 2051        | Blood Pressure - Both | 140240003        | O/E - BP reading raised (finding)                                |
| 2051        | Blood Pressure - Both | 140241004        | O/E - BP reading very high (finding)                             |
| 2051        | Blood Pressure - Both | 140235006        | O/E - BP reading very low (finding)                              |
| 2051        | Blood Pressure - Both | 140253000        | O/E - BP reading: no postural drop (finding)                     |
| 2051        | Blood Pressure - Both | 163040000        | O/E - BP reading: no postural drop (finding)                     |
| 2051        | Blood Pressure - Both | 140242006        | O/E - BP reading:postural drop (finding)                         |
| 2051        | Blood Pressure - Both | 140245008        | O/E - BP stable (finding)                                        |

|      |                            |                 |                                                                       |
|------|----------------------------|-----------------|-----------------------------------------------------------------------|
| 2051 | Blood Pressure - Both      | 147835003       | O/E - initial high BP (finding)                                       |
| 2051 | Blood Pressure - Both      | 140256008       | O/E-blood pressure reading NOS (finding)                              |
| 2051 | Blood Pressure - Both      | 163024003       | On examination - blood pressure borderline low (disorder)             |
| 2051 | Blood Pressure - Both      | 163026001       | On examination - blood pressure borderline raised (finding)           |
| 2051 | Blood Pressure - Both      | 163036009       | On examination - blood pressure decreased (finding)                   |
| 2051 | Blood Pressure - Both      | 163020007       | On examination - blood pressure reading (finding)                     |
| 2051 | Blood Pressure - Both      | 163023009       | On examination - blood pressure reading low (disorder)                |
| 2051 | Blood Pressure - Both      | 163025002       | On examination - blood pressure reading normal (finding)              |
| 2051 | Blood Pressure - Both      | 163043003       | On examination - blood pressure reading NOS (finding)                 |
| 2051 | Blood Pressure - Both      | 53222100000107  | On examination - blood pressure reading NOS (finding)                 |
| 2051 | Blood Pressure - Both      | 163027005       | On examination - blood pressure reading raised (finding)              |
| 2051 | Blood Pressure - Both      | 163028000       | On examination - blood pressure reading very high (finding)           |
| 2051 | Blood Pressure - Both      | 163022004       | On examination - blood pressure reading very low (disorder)           |
| 2051 | Blood Pressure - Both      | 313005002       | On examination - blood pressure reading: no postural drop (situation) |
| 2051 | Blood Pressure - Both      | 163029008       | On examination - blood pressure reading: postural drop (finding)      |
| 2051 | Blood Pressure - Both      | 163032006       | On examination - blood pressure stable (finding)                      |
| 2051 | Blood Pressure - Both      | 170581003       | On examination - initial high blood pressure (finding)                |
| 2051 | Blood Pressure - Both      | 271647008       | Raised blood pressure (finding)                                       |
| 2051 | Blood Pressure - Both      | 271869003       | Raised blood pressure reading (disorder)                              |
| 2051 | Blood Pressure - Both      | 33706100000109  | Self measured blood pressure reading                                  |
| 2051 | Blood Pressure - Both      | 33750100000104  | Self measured blood pressure reading                                  |
| 2051 | Blood Pressure - Both      | 33566100000109  | Self measured blood pressure reading (observable entity)              |
| 2051 | Blood Pressure - Both      | 163034007       | Standing blood pressure (observable entity)                           |
| 2051 | Blood Pressure - Both      | 140247000       | Standing blood pressure reading (observable entity)                   |
| 2051 | Blood Pressure - Both      | 364090009       | Systemic arterial pressure (observable entity)                        |
| 2051 | Blood Pressure - Both      | 386536003       | Systemic blood pressure (observable entity)                           |
| 2052 | Blood Pressure - Diastolic | 213051000000103 | Ambulatory diastolic blood pressure                                   |
| 2052 | Blood Pressure - Diastolic | 213061000000100 | Ambulatory diastolic blood pressure                                   |
| 2052 | Blood Pressure - Diastolic | 198091000000104 | Ambulatory diastolic blood pressure (observable entity)               |
| 2052 | Blood Pressure - Diastolic | 167061000000106 | Average 24 hour diastolic blood pressure                              |
| 2052 | Blood Pressure - Diastolic | 165011000000100 | Average 24 hour diastolic blood pressure                              |
| 2052 | Blood Pressure - Diastolic | 314462001       | Average 24 hour diastolic blood pressure (observable entity)          |
| 2052 | Blood Pressure - Diastolic | 165031000000108 | Average day interval diastolic blood pressure                         |
| 2052 | Blood Pressure - Diastolic | 167081000000102 | Average day interval diastolic blood pressure                         |
| 2052 | Blood Pressure - Diastolic | 314461008       | Average day interval diastolic blood pressure (observable entity)     |
| 2052 | Blood Pressure - Diastolic | 918051000000106 | Average diastolic blood pressure                                      |
| 2052 | Blood Pressure - Diastolic | 314453003       | Average diastolic blood pressure (observable entity)                  |
| 2052 | Blood Pressure - Diastolic | 167121000000104 | Average home diastolic blood pressure                                 |
| 2052 | Blood Pressure - Diastolic | 165071000000105 | Average home diastolic blood pressure                                 |
| 2052 | Blood Pressure - Diastolic | 413605002       | Average home diastolic blood pressure (observable entity)             |
| 2052 | Blood Pressure - Diastolic | 165051000000101 | Average night interval diastolic blood pressure                       |
| 2052 | Blood Pressure - Diastolic | 167101000000108 | Average night interval diastolic blood pressure                       |
| 2052 | Blood Pressure - Diastolic | 314460009       | Average night interval diastolic blood pressure (observable entity)   |
| 2052 | Blood Pressure - Diastolic | 945861000000100 | Baseline diastolic blood pressure                                     |
| 2052 | Blood Pressure - Diastolic | 945851000000103 | Baseline diastolic blood pressure (observable entity)                 |
| 2052 | Blood Pressure - Diastolic | 716632005       | Baseline diastolic blood pressure (observable entity)                 |

|      |                            |                  |                                                                    |
|------|----------------------------|------------------|--------------------------------------------------------------------|
| 2052 | Blood Pressure - Diastolic | 1036581000000107 | Central diastolic blood pressure                                   |
| 2052 | Blood Pressure - Diastolic | 1091811000000102 | Diastolic arterial pressure (observable entity)                    |
| 2052 | Blood Pressure - Diastolic | 67726005         | Diastolic arterial pressure (observable entity)                    |
| 2052 | Blood Pressure - Diastolic | 271650006        | Diastolic blood pressure (observable entity)                       |
| 2052 | Blood Pressure - Diastolic | 446226005        | Diastolic blood pressure on admission (observable entity)          |
| 2052 | Blood Pressure - Diastolic | 251073000        | Invasive diastolic arterial pressure (observable entity)           |
| 2052 | Blood Pressure - Diastolic | 95311000000107   | Lying diastolic blood pressure                                     |
| 2052 | Blood Pressure - Diastolic | 100181000000103  | Lying diastolic blood pressure                                     |
| 2052 | Blood Pressure - Diastolic | 407557002        | Lying diastolic blood pressure (observable entity)                 |
| 2052 | Blood Pressure - Diastolic | 1036571000000105 | Non-invasive central diastolic blood pressure (observable entity)  |
| 2052 | Blood Pressure - Diastolic | 174255007        | Non-invasive diastolic arterial pressure (observable entity)       |
| 2052 | Blood Pressure - Diastolic | 251072005        | Non-invasive diastolic arterial pressure (observable entity)       |
| 2052 | Blood Pressure - Diastolic | 140244007        | O/E - Diastolic BP reading (finding)                               |
| 2052 | Blood Pressure - Diastolic | 163031004        | On examination - Diastolic blood pressure reading (finding)        |
| 2052 | Blood Pressure - Diastolic | 95291000000106   | Sitting diastolic blood pressure                                   |
| 2052 | Blood Pressure - Diastolic | 100161000000107  | Sitting diastolic blood pressure                                   |
| 2052 | Blood Pressure - Diastolic | 407555005        | Sitting diastolic blood pressure (observable entity)               |
| 2052 | Blood Pressure - Diastolic | 75141000000102   | Standing diastolic blood pressure                                  |
| 2052 | Blood Pressure - Diastolic | 79411000000108   | Standing diastolic blood pressure                                  |
| 2052 | Blood Pressure - Diastolic | 400975005        | Standing diastolic blood pressure (observable entity)              |
| 2053 | Blood Pressure - Systolic  | 314464000        | 24 hour systolic blood pressure (observable entity)                |
| 2053 | Blood Pressure - Systolic  | 213031000000105  | Ambulatory systolic blood pressure                                 |
| 2053 | Blood Pressure - Systolic  | 213041000000101  | Ambulatory systolic blood pressure                                 |
| 2053 | Blood Pressure - Systolic  | 198081000000101  | Ambulatory systolic blood pressure (observable entity)             |
| 2053 | Blood Pressure - Systolic  | 167071000000104  | Average 24 hour systolic blood pressure                            |
| 2053 | Blood Pressure - Systolic  | 165021000000106  | Average 24 hour systolic blood pressure                            |
| 2053 | Blood Pressure - Systolic  | 314449000        | Average 24 hour systolic blood pressure (observable entity)        |
| 2053 | Blood Pressure - Systolic  | 165041000000104  | Average day interval systolic blood pressure                       |
| 2053 | Blood Pressure - Systolic  | 167091000000100  | Average day interval systolic blood pressure                       |
| 2053 | Blood Pressure - Systolic  | 314446007        | Average day interval systolic blood pressure (observable entity)   |
| 2053 | Blood Pressure - Systolic  | 165081000000107  | Average home systolic blood pressure                               |
| 2053 | Blood Pressure - Systolic  | 167131000000102  | Average home systolic blood pressure                               |
| 2053 | Blood Pressure - Systolic  | 413606001        | Average home systolic blood pressure (observable entity)           |
| 2053 | Blood Pressure - Systolic  | 165061000000103  | Average night interval systolic blood pressure                     |
| 2053 | Blood Pressure - Systolic  | 167111000000105  | Average night interval systolic blood pressure                     |
| 2053 | Blood Pressure - Systolic  | 314445006        | Average night interval systolic blood pressure (observable entity) |
| 2053 | Blood Pressure - Systolic  | 918041000000108  | Average systolic blood pressure                                    |
| 2053 | Blood Pressure - Systolic  | 314440001        | Average systolic blood pressure (observable entity)                |
| 2053 | Blood Pressure - Systolic  | 945881000000109  | Baseline systolic blood pressure                                   |
| 2053 | Blood Pressure - Systolic  | 945871000000107  | Baseline systolic blood pressure (observable entity)               |
| 2053 | Blood Pressure - Systolic  | 716579001        | Baseline systolic blood pressure (observable entity)               |
| 2053 | Blood Pressure - Systolic  | 1036561000000103 | Central systolic blood pressure                                    |
| 2053 | Blood Pressure - Systolic  | 251071003        | Invasive systolic arterial pressure (observable entity)            |
| 2053 | Blood Pressure - Systolic  | 100171000000100  | Lying systolic blood pressure                                      |
| 2053 | Blood Pressure - Systolic  | 95301000000105   | Lying systolic blood pressure                                      |
| 2053 | Blood Pressure - Systolic  | 407556006        | Lying systolic blood pressure (observable entity)                  |

|      |                           |                  |                                                                                                                                                              |
|------|---------------------------|------------------|--------------------------------------------------------------------------------------------------------------------------------------------------------------|
| 2053 | Blood Pressure - Systolic | 314448008        | Maximum 24 hour systolic blood pressure (observable entity)                                                                                                  |
| 2053 | Blood Pressure - Systolic | 314444005        | Maximum day interval systolic blood pressure (observable entity)                                                                                             |
| 2053 | Blood Pressure - Systolic | 314443004        | Maximum night interval systolic blood pressure (observable entity)                                                                                           |
| 2053 | Blood Pressure - Systolic | 314439003        | Maximum systolic blood pressure (observable entity)                                                                                                          |
| 2053 | Blood Pressure - Systolic | 314447003        | Minimum 24 hour systolic blood pressure (observable entity)                                                                                                  |
| 2053 | Blood Pressure - Systolic | 314441002        | Minimum day interval systolic blood pressure (observable entity)                                                                                             |
| 2053 | Blood Pressure - Systolic | 314442009        | Minimum night interval systolic blood pressure (observable entity)                                                                                           |
| 2053 | Blood Pressure - Systolic | 314438006        | Minimum systolic blood pressure (observable entity)                                                                                                          |
| 2053 | Blood Pressure - Systolic | 1036551000000101 | Non-invasive central systolic blood pressure (observable entity)                                                                                             |
| 2053 | Blood Pressure - Systolic | 251070002        | Non-invasive systolic arterial pressure (observable entity)                                                                                                  |
| 2053 | Blood Pressure - Systolic | 140243001        | O/E - Systolic BP reading (finding)                                                                                                                          |
| 2053 | Blood Pressure - Systolic | 163030003        | On examination - Systolic blood pressure reading (finding)                                                                                                   |
| 2053 | Blood Pressure - Systolic | 1104341000000101 | Royal College of Physicians National Early Warning Score 2 - systolic blood pressure score (observable entity)                                               |
| 2053 | Blood Pressure - Systolic | 95281000000109   | Sitting systolic blood pressure                                                                                                                              |
| 2053 | Blood Pressure - Systolic | 100151000000109  | Sitting systolic blood pressure                                                                                                                              |
| 2053 | Blood Pressure - Systolic | 407554009        | Sitting systolic blood pressure (observable entity)                                                                                                          |
| 2053 | Blood Pressure - Systolic | 75131000000106   | Standing systolic blood pressure                                                                                                                             |
| 2053 | Blood Pressure - Systolic | 79401000000106   | Standing systolic blood pressure                                                                                                                             |
| 2053 | Blood Pressure - Systolic | 400974009        | Standing systolic blood pressure (observable entity)                                                                                                         |
| 2053 | Blood Pressure - Systolic | 72313002         | Systolic arterial pressure (observable entity)                                                                                                               |
| 2053 | Blood Pressure - Systolic | 271649006        | Systolic blood pressure (observable entity)                                                                                                                  |
| 2053 | Blood Pressure - Systolic | 708502007        | Systolic blood pressure of neonate at birth (observable entity)                                                                                              |
| 2053 | Blood Pressure - Systolic | 399304008        | Systolic blood pressure on admission (observable entity)                                                                                                     |
| 2050 | HbA1c                     | 567641000000108  | Haemoglobin A1c - diabetic control NOS (observable entity)                                                                                                   |
| 2050 | HbA1c                     | 936121000000108  | Haemoglobin A1c (diagnostic reference range)                                                                                                                 |
| 2050 | HbA1c                     | 1049311000000103 | Haemoglobin A1c (diagnostic reference range) - International Federation of Clinical Chemistry and Laboratory Medicine standardised                           |
| 2050 | HbA1c                     | 955411000000102  | Haemoglobin A1c (diagnostic reference range) - International Federation of Clinical Chemistry and Laboratory Medicine standardised (observable entity)       |
| 2050 | HbA1c                     | 936111000000102  | Haemoglobin A1c (diagnostic reference range) (observable entity)                                                                                             |
| 2050 | HbA1c                     | 1010951000000100 | Haemoglobin A1c (diagnostic reference range) (observable entity)                                                                                             |
| 2050 | HbA1c                     | 1049331000000106 | Haemoglobin A1c (monitoring ranges) - International Federation of Clinical Chemistry and Laboratory Medicine standardised                                    |
| 2050 | HbA1c                     | 955421000000108  | Haemoglobin A1c (monitoring ranges) - International Federation of Clinical Chemistry and Laboratory Medicine standardised (observable entity)                |
| 2050 | HbA1c                     | 936131000000105  | Haemoglobin A1c (monitoring ranges) (observable entity)                                                                                                      |
| 2050 | HbA1c                     | 1010941000000103 | Haemoglobin A1c (monitoring ranges) (observable entity)                                                                                                      |
| 2050 | HbA1c                     | 936141000000101  | Haemoglobin A1c (monitoring reference ranges)                                                                                                                |
| 2050 | HbA1c                     | 999791000000106  | Haemoglobin A1c level - International Federation of Clinical Chemistry and Laboratory Medicine standardised (observable entity)                              |
| 2050 | HbA1c                     | 1019431000000105 | Haemoglobin A1c level (Diabetes Control and Complications Trial aligned) (observable entity)                                                                 |
| 2050 | HbA1c                     | 1049301000000100 | Haemoglobin A1c level (diagnostic reference range) - International Federation of Clinical Chemistry and Laboratory Medicine standardised (observable entity) |
| 2050 | HbA1c                     | 1049321000000109 | Haemoglobin A1c level (monitoring ranges) - International Federation of Clinical Chemistry and Laboratory Medicine standardised (observable entity)          |
| 2050 | HbA1c                     | 1003671000000109 | Haemoglobin A1c level (observable entity)                                                                                                                    |
| 2050 | HbA1c                     | 491841000000105  | Haemoglobin A1c level (observable entity)                                                                                                                    |
| 2050 | HbA1c                     | 727941000000108  | Haemoglobin A1c target - International Federation of Clinical Chemistry and Laboratory Medicine standardised                                                 |
| 2050 | HbA1c                     | 727931000000104  | Haemoglobin A1c target - International Federation of Clinical Chemistry and Laboratory Medicine standardised (observable entity)                             |
| 2050 | HbA1c                     | 165683005        | Hb. A1C - diabetic control NOS (observable entity)                                                                                                           |
| 2050 | HbA1c                     | 143085005        | Hb. A1C - diabetic control NOS (procedure)                                                                                                                   |
| 2050 | HbA1c                     | 143080000        | Hb. A1C - glycated haemoglobin (& [diabetic control]) (procedure)                                                                                            |
| 2050 | HbA1c                     | 165678002        | Hb. A1C - glycated haemoglobin (& [diabetic control]) (procedure)                                                                                            |

|      |                   |                   |                                                                                                                                                              |
|------|-------------------|-------------------|--------------------------------------------------------------------------------------------------------------------------------------------------------------|
| 2050 | HbA1c             | 143127002         | HbA1 - diabetic control (observable entity)                                                                                                                  |
| 2050 | HbA1c             | 165723000         | HbA1 - diabetic control (observable entity)                                                                                                                  |
| 2050 | HbA1c             | 310309003         | HbA1 - diabetic control interpretation (observable entity)                                                                                                   |
| 2050 | HbA1c             | 86551000000108    | HbA1c target                                                                                                                                                 |
| 2050 | HbA1c             | 107991000000100   | HbA1c target                                                                                                                                                 |
| 2050 | HbA1c             | 269823000         | Hemoglobin A1C - diabetic control interpretation (observable entity)                                                                                         |
| 2050 | HbA1c             | 408591000         | Hemoglobin A1c target (observable entity)                                                                                                                    |
| 2050 | HbA1c             | 446074002         | Hemoglobin A1c target value using International Federation of Clinical Chemistry and Laboratory Medicine standardized method (observable entity)             |
| 2050 | HbA1c             | 443911005         | Ordinal level of hemoglobin A1c (observable entity)                                                                                                          |
| 2050 | HbA1c             | 1107481000000106  | Substance concentration of haemoglobin A1c in blood (observable entity)                                                                                      |
| 2050 | HbA1c             | 1013511000000100  | Total glycosylated haemoglobin level (observable entity)                                                                                                     |
| 1523 | HbA1c_DCCT        | 1019431000000105  | Haemoglobin A1c level (Diabetes Control and Complications Trial aligned) (observable entity)                                                                 |
| 1522 | HbA1c_IFCC        | 936121000000108   | Haemoglobin A1c (diagnostic reference range)                                                                                                                 |
| 1522 | HbA1c_IFCC        | 1049311000000103  | Haemoglobin A1c (diagnostic reference range) - International Federation of Clinical Chemistry and Laboratory Medicine standardised                           |
| 1522 | HbA1c_IFCC        | 955411000000102   | Haemoglobin A1c (diagnostic reference range) - International Federation of Clinical Chemistry and Laboratory Medicine standardised (observable entity)       |
| 1522 | HbA1c_IFCC        | 936111000000102   | Haemoglobin A1c (diagnostic reference range) (observable entity)                                                                                             |
| 1522 | HbA1c_IFCC        | 1049331000000106  | Haemoglobin A1c (monitoring ranges) - International Federation of Clinical Chemistry and Laboratory Medicine standardised                                    |
| 1522 | HbA1c_IFCC        | 955421000000108   | Haemoglobin A1c (monitoring ranges) - International Federation of Clinical Chemistry and Laboratory Medicine standardised (observable entity)                |
| 1522 | HbA1c_IFCC        | 936131000000105   | Haemoglobin A1c (monitoring ranges) (observable entity)                                                                                                      |
| 1522 | HbA1c_IFCC        | 936141000000101   | Haemoglobin A1c (monitoring reference ranges)                                                                                                                |
| 1522 | HbA1c_IFCC        | 999791000000106   | Haemoglobin A1c level - International Federation of Clinical Chemistry and Laboratory Medicine standardised (observable entity)                              |
| 1522 | HbA1c_IFCC        | 1049301000000100  | Haemoglobin A1c level (diagnostic reference range) - International Federation of Clinical Chemistry and Laboratory Medicine standardised (observable entity) |
| 1522 | HbA1c_IFCC        | 1049321000000109  | Haemoglobin A1c level (monitoring ranges) - International Federation of Clinical Chemistry and Laboratory Medicine standardised (observable entity)          |
| 1524 | HbA1c_Unspecified | 1010951000000100  | Haemoglobin A1c (diagnostic reference range) (observable entity)                                                                                             |
| 1524 | HbA1c_Unspecified | 1010941000000103  | Haemoglobin A1c (monitoring ranges) (observable entity)                                                                                                      |
| 1524 | HbA1c_Unspecified | 1003671000000109  | Haemoglobin A1c level (observable entity)                                                                                                                    |
| 1524 | HbA1c_Unspecified | 1107481000000106  | Substance concentration of haemoglobin A1c in blood (observable entity)                                                                                      |
| 1518 | INRMonitor_num    | 142988001         | International normalised ratio (procedure)                                                                                                                   |
| 1518 | INRMonitor_num    | 165581004         | International normalized ratio (observable entity)                                                                                                           |
| 1518 | INRMonitor_num    | 440432009         | International normalized ratio result obtained using portable international normalized ratio monitoring device (observable entity)                           |
| 2056 | Total cholesterol | 84698008          | Cholesterol (substance)                                                                                                                                      |
| 2056 | Total cholesterol | 18520611000001106 | Cholesterol (substance)                                                                                                                                      |
| 2056 | Total cholesterol | 301875003         | Cholesterol analyte (substance)                                                                                                                              |
| 2056 | Total cholesterol | 8509810000000101  | Cholesterol level (observable entity)                                                                                                                        |
| 2056 | Total cholesterol | 8524010000000104  | Maximum cholesterol level (observable entity)                                                                                                                |
| 2056 | Total cholesterol | 8524110000000102  | Minimum cholesterol level (observable entity)                                                                                                                |
| 2056 | Total cholesterol | 1017161000000104  | Plasma total cholesterol level (observable entity)                                                                                                           |
| 2056 | Total cholesterol | 1005671000000105  | Serum cholesterol level (observable entity)                                                                                                                  |
| 2056 | Total cholesterol | 1026441000000100  | Serum cholesterol studies (observable entity)                                                                                                                |
| 2056 | Total cholesterol | 1083761000000106  | Serum fasting total cholesterol level (observable entity)                                                                                                    |
| 2056 | Total cholesterol | 994351000000103   | Serum total cholesterol level (observable entity)                                                                                                            |
| 2056 | Total cholesterol | 1106531000000105  | Substance concentration of cholesterol in plasma (observable entity)                                                                                         |
| 2056 | Total cholesterol | 1106541000000101  | Substance concentration of cholesterol in serum (observable entity)                                                                                          |
| 2056 | Total cholesterol | 301860006         | Total cholesterol (substance)                                                                                                                                |
| 2056 | Total cholesterol | 8536810000000104  | Total cholesterol level (observable entity)                                                                                                                  |
